# Supplementary material
Source: publisher figshare collection journal article supplement (https://acs.figshare.com/ndownloader/files/7300601)

# Multistep Oxidation of Diethynyl Oligophenylamine-Bridged Diruthenium and Diiron Complexes

Jing Zhang,<sup>†</sup> Shen-Zhen Guo,<sup>†</sup> Yu-Bao Dong,<sup>†</sup> Li Rao,<sup>†</sup> Jun Yin,<sup>†</sup> Guang-Ao Yu,<sup>†</sup>

František Hartl,<sup>\*,‡</sup> Sheng Hua Liu<sup>\*,†</sup>

<sup>†</sup> *Key Laboratory of Pesticide and Chemical Biology, Ministry of Education, College of Chemistry, Central China Normal University, Wuhan 430079, P.R. China*

<sup>‡</sup> *Department of Chemistry, University of Reading, Whiteknights, Reading RG6 6AD, U.K.*

## Crystallographic Information

**Table S1.** Crystal data and parameters of data collection and refinement for complexes **1a** and **2a**.

| Complex                                    | <b>1a</b>                                                       | <b>2a</b>                                                                                                            |
|--------------------------------------------|-----------------------------------------------------------------|----------------------------------------------------------------------------------------------------------------------|
| Formula                                    | C <sub>94</sub> H <sub>91</sub> NP <sub>4</sub> Ru <sub>2</sub> | C <sub>106</sub> H <sub>100</sub> N <sub>2</sub> P <sub>4</sub> Ru <sub>2</sub> •3(CH <sub>2</sub> Cl <sub>2</sub> ) |
| Formula weight                             | 1560.70                                                         | 1982.67                                                                                                              |
| Temperature (K)                            | 298(2)                                                          | 296(2)                                                                                                               |
| Crystal system                             | Monoclinic                                                      | Triclinic                                                                                                            |
| Space group                                | <i>C2/c</i>                                                     | <i>P</i> -1                                                                                                          |
| <i>a</i> (Å)                               | 42.877(6)                                                       | 9.848 (3)                                                                                                            |
| <i>b</i> (Å)                               | 9.6957(14)                                                      | 14.954 (5)                                                                                                           |
| <i>c</i> (Å)                               | 21.349(3)                                                       | 16.443 (6)                                                                                                           |
| <i>α</i> (°)                               | 90                                                              | 77.951 (5)                                                                                                           |
| <i>β</i> (°)                               | 112.940 (2)                                                     | 89.872 (5)                                                                                                           |
| <i>γ</i> (°)                               | 90                                                              | 80.650 (5)                                                                                                           |
| <i>V</i> (Å <sup>3</sup> )                 | 8173 (2)                                                        | 2335.4 (14)                                                                                                          |
| <i>Z</i>                                   | 4                                                               | 1                                                                                                                    |
| Density (calculated) (Mg/m <sup>3</sup> )  | 1.268                                                           | 1.410                                                                                                                |
| Absorption coefficient (mm <sup>-1</sup> ) | 0.49                                                            | 0.61                                                                                                                 |
| <i>F</i> (000)                             | 3240                                                            | 1024                                                                                                                 |
| Crystal size (mm <sup>3</sup> )            | 0.20 × 0.20 × 0.10                                              | 0.20 × 0.20 × 0.20                                                                                                   |
| Theta range for data collection (°)        | 1.03 to 28.00                                                   | 1.267 to 28.128                                                                                                      |

|                                                     |                                                                  |                                                                  |
|-----------------------------------------------------|------------------------------------------------------------------|------------------------------------------------------------------|
| Index ranges                                        | -56 ≤ <i>h</i> ≤ 55, -12 ≤ <i>k</i> ≤ 12,<br>-27 ≤ <i>l</i> ≤ 28 | -13 ≤ <i>h</i> ≤ 13, -19 ≤ <i>k</i> ≤ 19,<br>-21 ≤ <i>l</i> ≤ 21 |
| Reflections collected                               | 34815                                                            | 19652                                                            |
| Independent reflections                             | 9817 [ <i>R</i> (int) = 0.037]                                   | 10847 [ <i>R</i> (int) = 0.053]                                  |
| Max. and min. transmission                          | 0.952 and 0.908                                                  | 0.746 and 0.539                                                  |
| Data / restraints / parameters                      | 9817 / 0 / 462                                                   | 10847 / 39 / 582                                                 |
| Goodness-of-fit on <i>F</i> <sup>2</sup>            | 1.132                                                            | 1.081                                                            |
| Final <i>R</i> indices [ <i>I</i> > 2σ( <i>I</i> )] | <i>R</i> 1 = 0.0450, <i>wR</i> 2 =<br>0.1188                     | <i>R</i> 1 = 0.1398, <i>wR</i> 2 = 0.4261                        |
| <i>R</i> indices (all data)                         | <i>R</i> 1 = 0.0664, <i>wR</i> 2 =<br>0.1389                     | <i>R</i> 1 = 0.1608, <i>wR</i> 2 = 0.4097                        |
| Largest diff. peak and hole                         | 1.09 and -0.37 e. <sup>-3</sup>                                  | 5.85 and -1.63 e. <sup>-3</sup>                                  |

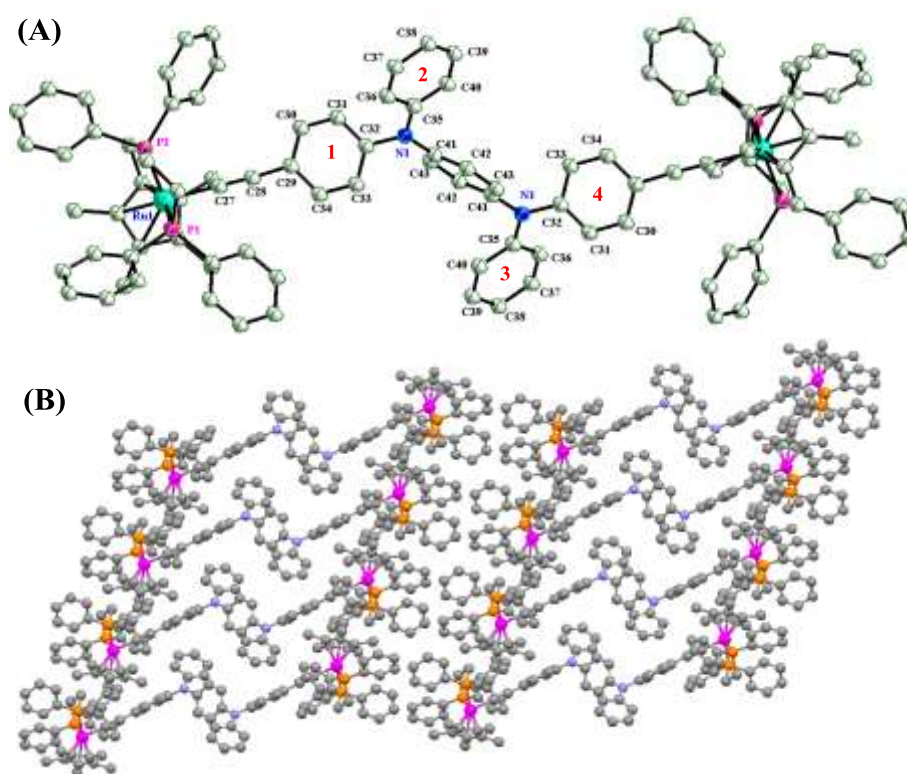

**Figure S1.** X-ray crystal structure of **2a** shown with thermal ellipsoids at the 50% probability level (A), and the packing view of **2a** (B). Hydrogen atoms and co-crystallized solvent molecules have been omitted for clarity. CCDC 1435473.

## Spectro-Electrochemical Information

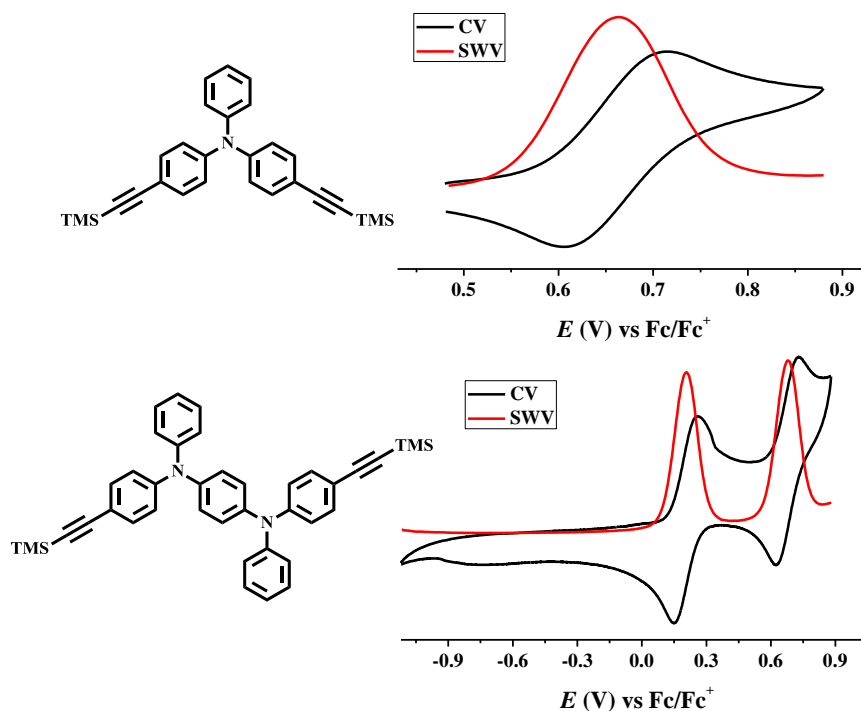

**Figure S2.** Cyclic voltammograms (CV,  $\nu = 50 \text{ mV s}^{-1}$ ) and corresponding square-wave voltammograms (SWV, at  $f = 10 \text{ Hz}$  and  $t_p = 25 \text{ mV}$ ) of the ligand bridge precursors **1d** (top) and **2d** (bottom).

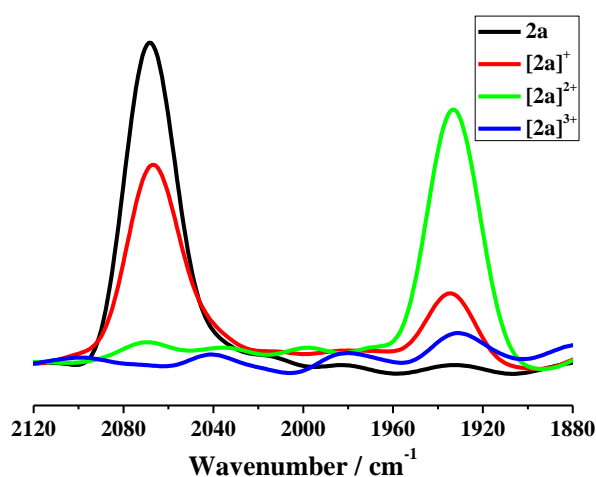

**Figure S3.** IR spectra in the  $\nu(\text{C}\equiv\text{C})$  region recorded for complex **2a** in four different oxidation states generated in  $\text{CH}_2\text{Cl}_2/10^{-1} \text{ M } n\text{-Bu}_4\text{NPF}_6$  at 298 K within an OTTLE cell. Note that singly oxidized **[2a]<sup>+</sup>** cannot be obtained in the pure form due to its partial valence disproportionation to **2a** and **[2a]<sup>2+</sup>**.

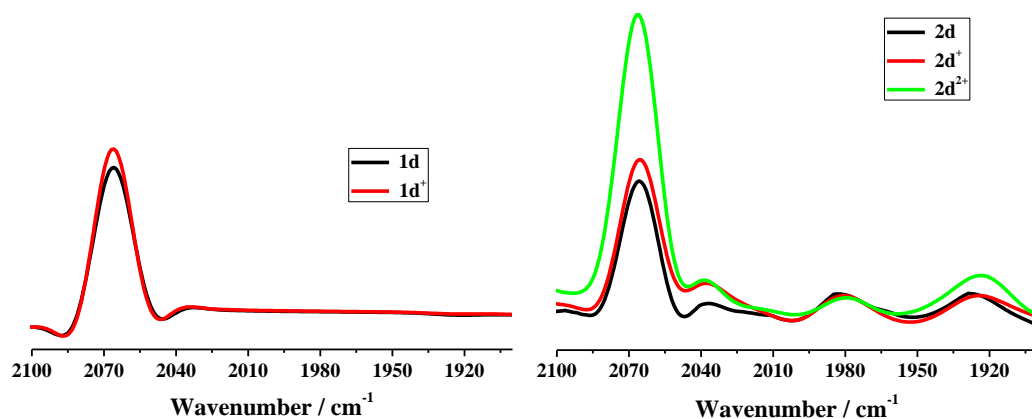

**Figure S4.** IR spectra recorded in the  $\nu(\text{C}\equiv\text{C})$  region for compounds **1d** and **2d** in different oxidation states (0, +1 or +2) generated in  $\text{CH}_2\text{Cl}_2/10^{-1}$  M  $n\text{-Bu}_4\text{NPF}_6$  at 298 K within an OTTLE cell.

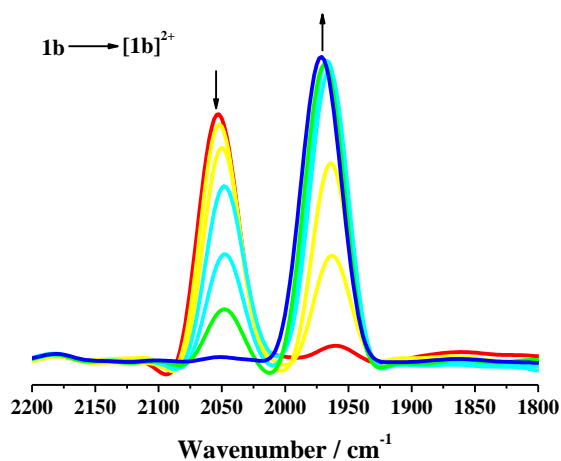

**Figure S5.** IR spectra recorded in the  $\nu(\text{C}\equiv\text{C})$  region during the electrochemical oxidation of **1b** into  $[\mathbf{1b}]^{2+}$  in  $\text{CH}_2\text{Cl}_2/10^{-1}$  M  $n\text{-Bu}_4\text{NPF}_6$  at 298 K within an OTTLE cell. The process involves an equilibrium with the minor mixed-valence state  $[\mathbf{1b}]^+$  (see also Figure S6).

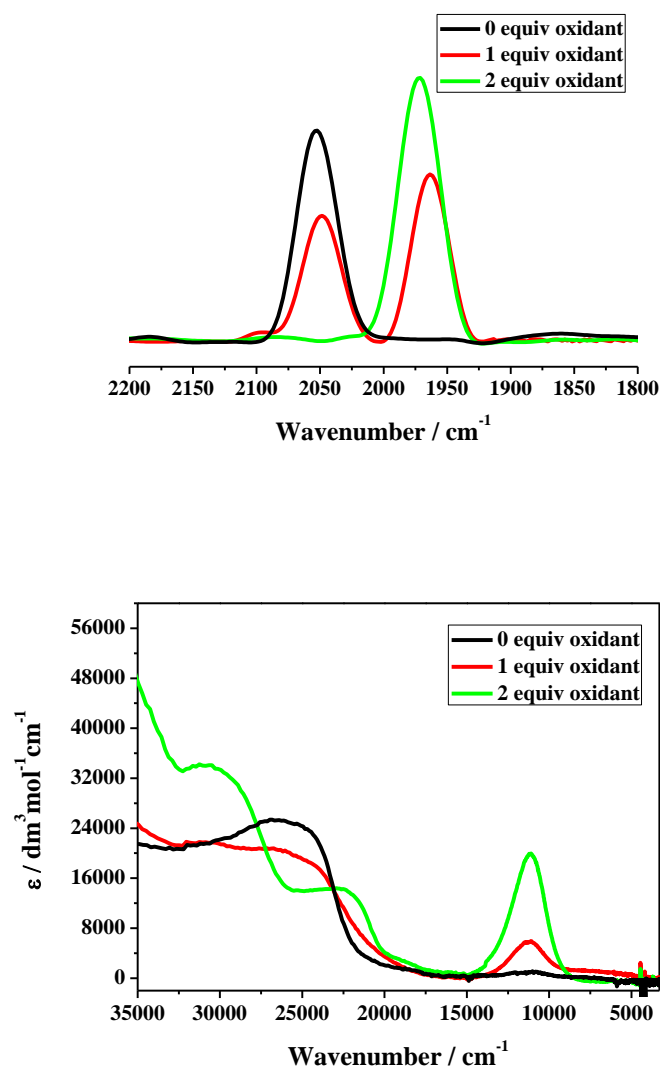

**Figure S6.** Infra-red (top) and electronic absorption (bottom) spectra of parent complex **1b** (black) and **[1b]<sup>2+</sup>** (green) recorded after oxidation of **1b** with ferrocenium hexafluorophosphate ( $\text{FcPF}_6$ ) in  $\text{CH}_2\text{Cl}_2$  at room temperature. The intermediate spectra (red) correspond to the oxidation with 1 equiv.  $\text{FcPF}_6$ , which produced some **[1b]<sup>+</sup>** identified by the transient NIR absorption below 10000  $\text{cm}^{-1}$ .

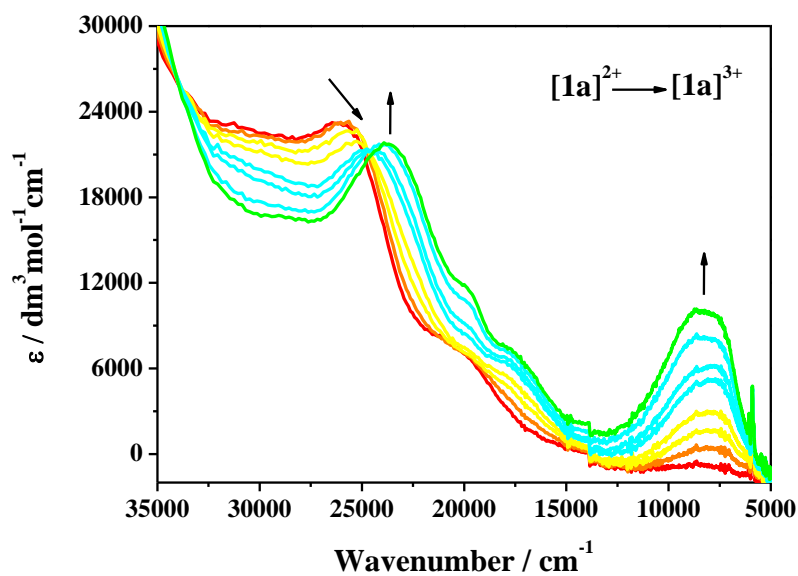

**Figure S7.** UV-vis-NIR spectral changes recorded during the oxidation of complex  $[\mathbf{1a}]^{2+}$  to  $[\mathbf{1a}]^{3+}$  in  $\text{CH}_2\text{Cl}_2/10^{-1} \text{ M } n\text{-Bu}_4\text{NPF}_6$  at 298 K within an OTTLE cell.

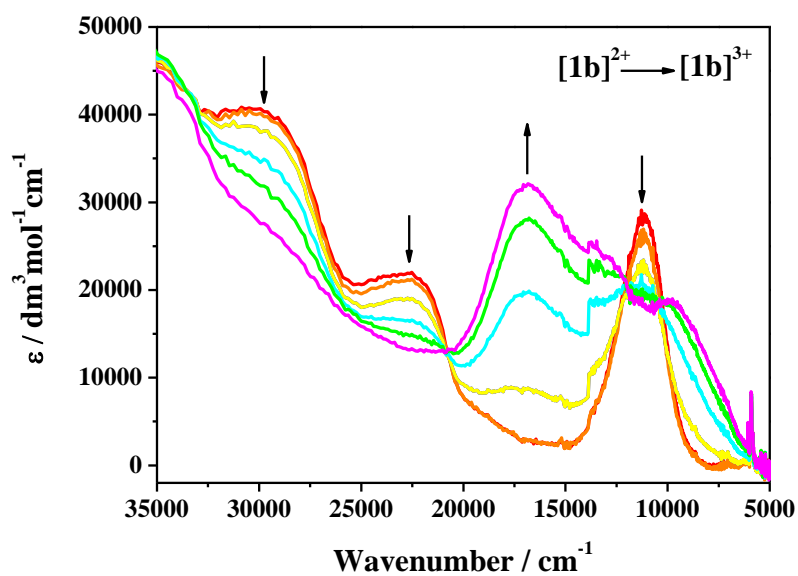

**Figure S8.** UV-vis-NIR spectral changes recorded during the oxidation of complex  $[\mathbf{1b}]^{2+}$  to  $[\mathbf{1b}]^{3+}$  in  $\text{CH}_2\text{Cl}_2/10^{-1} \text{ M } n\text{-Bu}_4\text{NPF}_6$  at 298 K within an OTTLE cell.

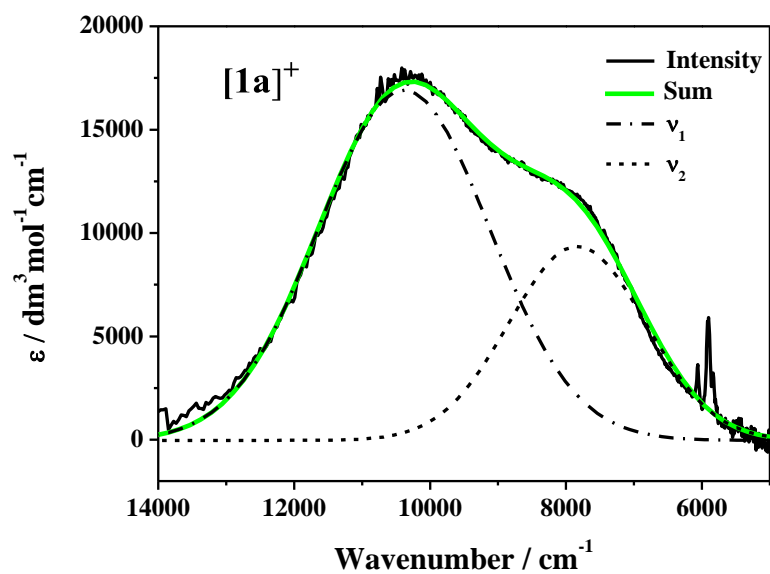

**Figure S9.** Deconvolution of the intense NIR absorption of  $[1a]^+$  (recorded during the anodic spectroelectrochemistry, see Figure 4 in the main text) into two Gaussian-shaped bands. Table S2 presents the corresponding electronic parameters.

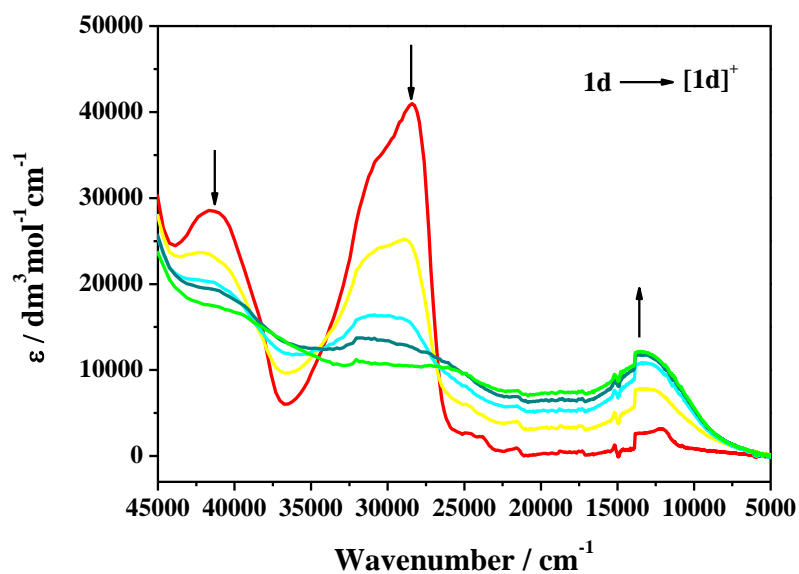

**Figure S10.** UV-vis-NIR spectral changes recorded during the oxidation of TMS-terminated reference compound  $1d$  to  $[1d]^+$  in  $CH_2Cl_2/10^{-1}$  M  $n-Bu_4NPF_6$  at 298 K within an OTTLE cell.

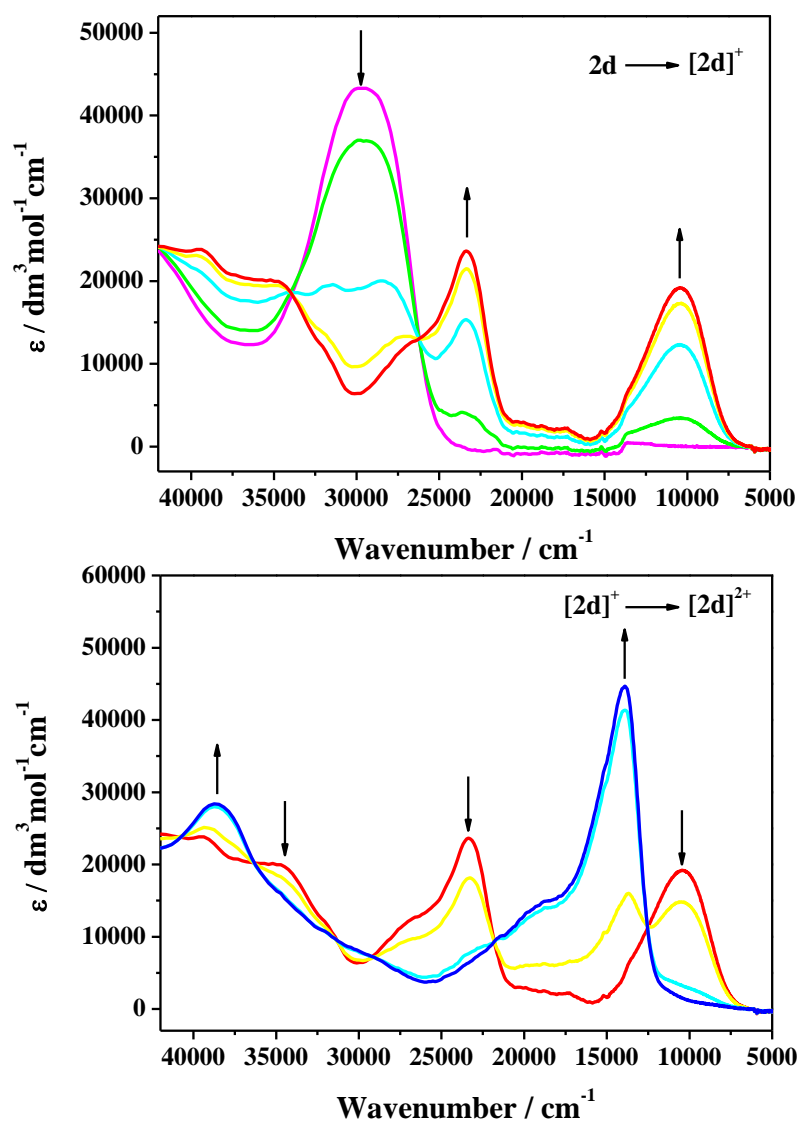

**Figure S11.** UV-vis-NIR spectral changes recorded during the oxidation of TMS-terminated reference compound **2d** to **[2d]<sup>+</sup>** (top), and **[2d]<sup>2+</sup>** (bottom) in CH<sub>2</sub>Cl<sub>2</sub>/10<sup>-1</sup> M *n*-Bu<sub>4</sub>NPF<sub>6</sub> at 298 K within an OTTLE cell.



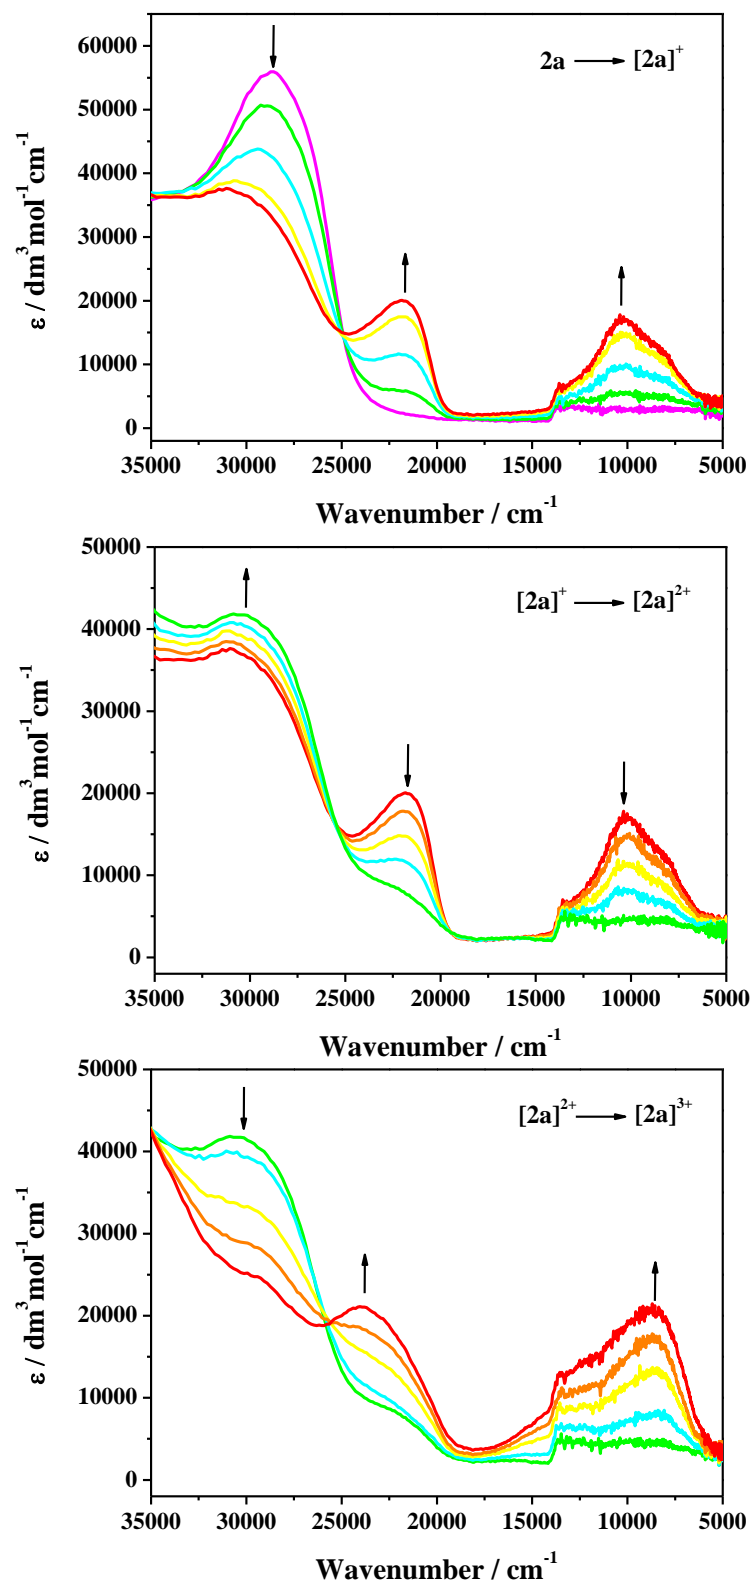

**Figure S12.** UV-vis-NIR spectral changes recorded during the careful stepwise oxidation of complex **2a** to  $[\mathbf{2a}]^+$  (top, not pure),  $[\mathbf{2a}]^{2+}$  (middle) and  $[\mathbf{2a}]^{3+}$  (bottom) in  $\text{CH}_2\text{Cl}_2/10^{-1} \text{ M } n\text{-Bu}_4\text{NPF}_6$  at 298 K within an OTTLE cell. The generation of  $[\mathbf{2a}]^+$  is accompanied by some disproportionation to **2a** and  $[\mathbf{2a}]^{2+}$ .

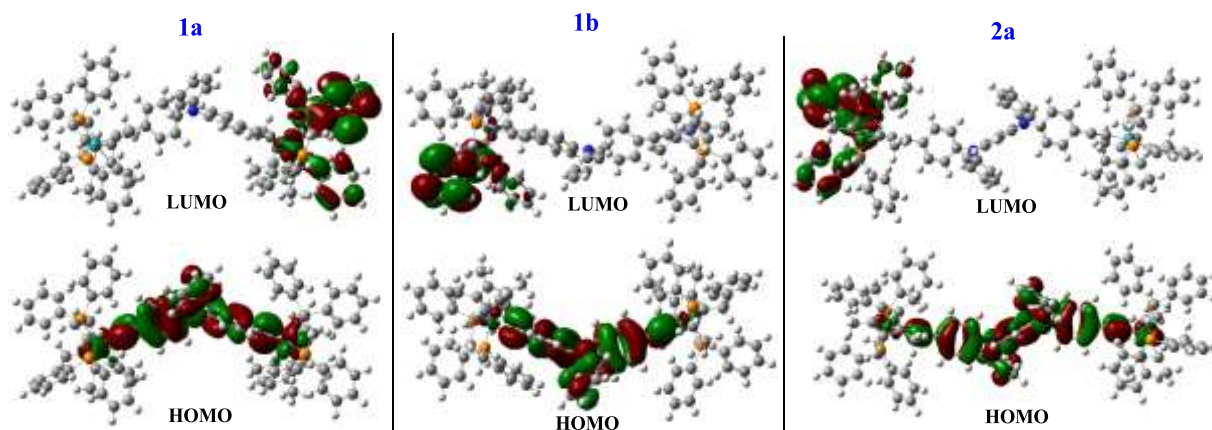

**Figure S13.** Frontier molecular orbitals of neutral complexes **1a**, **1b** and **2a** computed with the BLYP35/6-31G\* method. Notably, the HOMOs are dominantly localized on the bridging ligands, which does not correspond with the asymmetric spin localization in the corresponding monocations, see Figure 6 in the main text.

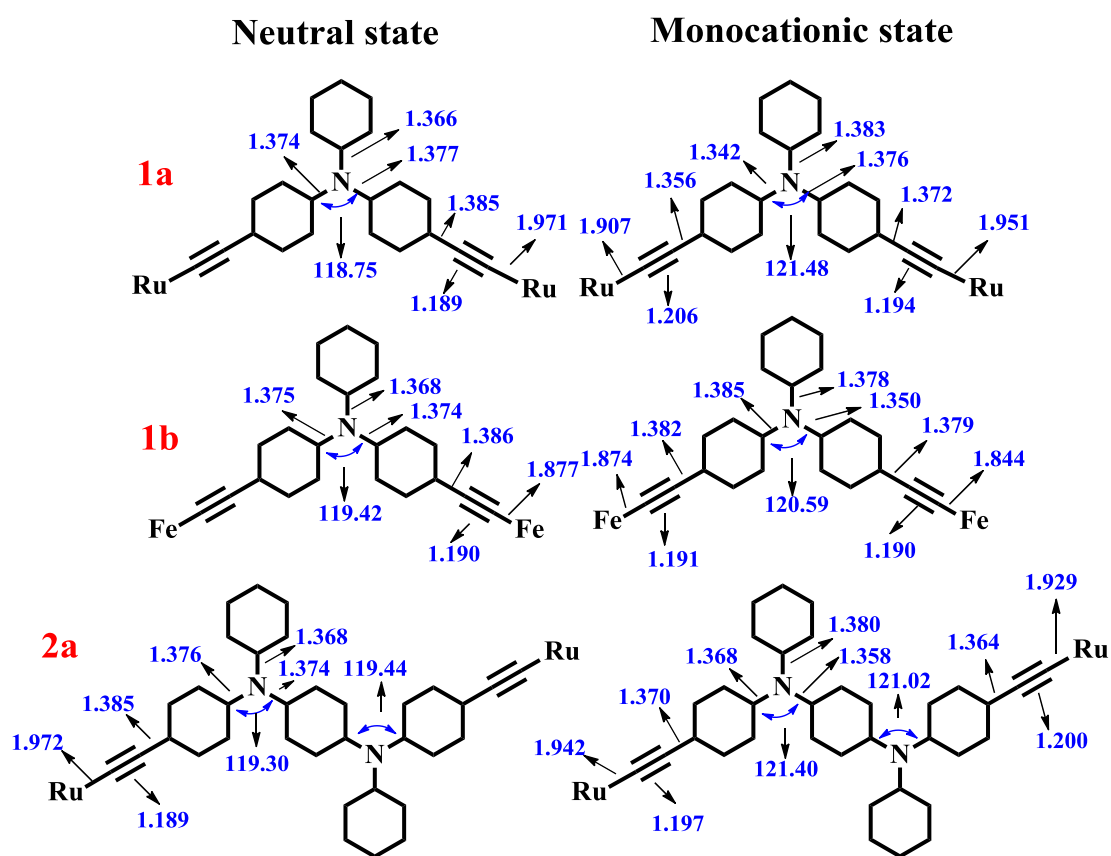

**Figure S14.** Schematic diagrams of structural parameters (bond length [Å] and angle [°]) in neutral (left) and mixed-valence monocationic (right) states of complexes **1a**, **1b** and **2a** resulting

from DFT calculations.

**Table S2.** Selected parameters derived from deconvolution of the NIR absorption band envelope in **[1a]<sup>+</sup>**.<sup>a</sup>

| Complex                                                                                         | <b>[1a]<sup>+</sup></b> |
|-------------------------------------------------------------------------------------------------|-------------------------|
| $\nu_1/\text{cm}^{-1}$ ( $\epsilon_{\text{max}}/\text{dm}^3 \text{ mol}^{-1} \text{ cm}^{-1}$ ) | 10200 (18100)           |
| $\nu_2/\text{cm}^{-1}$ ( $\epsilon_{\text{max}}/\text{dm}^3 \text{ mol}^{-1} \text{ cm}^{-1}$ ) | 7800 (12400)            |
| $\Delta(\nu_2)_{1/2}$ <sup>b</sup>                                                              | 2300                    |
| $\Delta(\nu_{\text{IVCT}})_{1/2}(\text{calc})$ <sup>c</sup>                                     | 4244                    |
| $R_{\text{ab}}$ <sup>d</sup> (Å)                                                                | 14.19                   |
| $H_{\text{ab}}$ (cm <sup>-1</sup> ) <sup>e</sup>                                                | 685                     |

<sup>a</sup>The monocation was generated within a spectroelectrochemical cell from a solution in CH<sub>2</sub>Cl<sub>2</sub>/10<sup>-1</sup> M *n*-Bu<sub>4</sub>NPF<sub>6</sub>.

<sup>b</sup>The observed half-height bandwidth. <sup>c</sup> $\Delta(\nu_{\text{IVCT}})_{1/2}(\text{calc}) = 2[4 \ln(2)\nu_{\text{IVCT}}RT]^{1/2} = [2310\nu_{\text{IVCT}}]^{1/2}$  at ambient temperature. <sup>d</sup>Determined from the single crystal structure of **1a**. <sup>e</sup> $H_{\text{ab}} = (2.06 \times 10^{-2}/R_{\text{ab}})(\epsilon_{\text{max}}\nu_{\text{max}}\Delta\nu)^{1/2}$ .

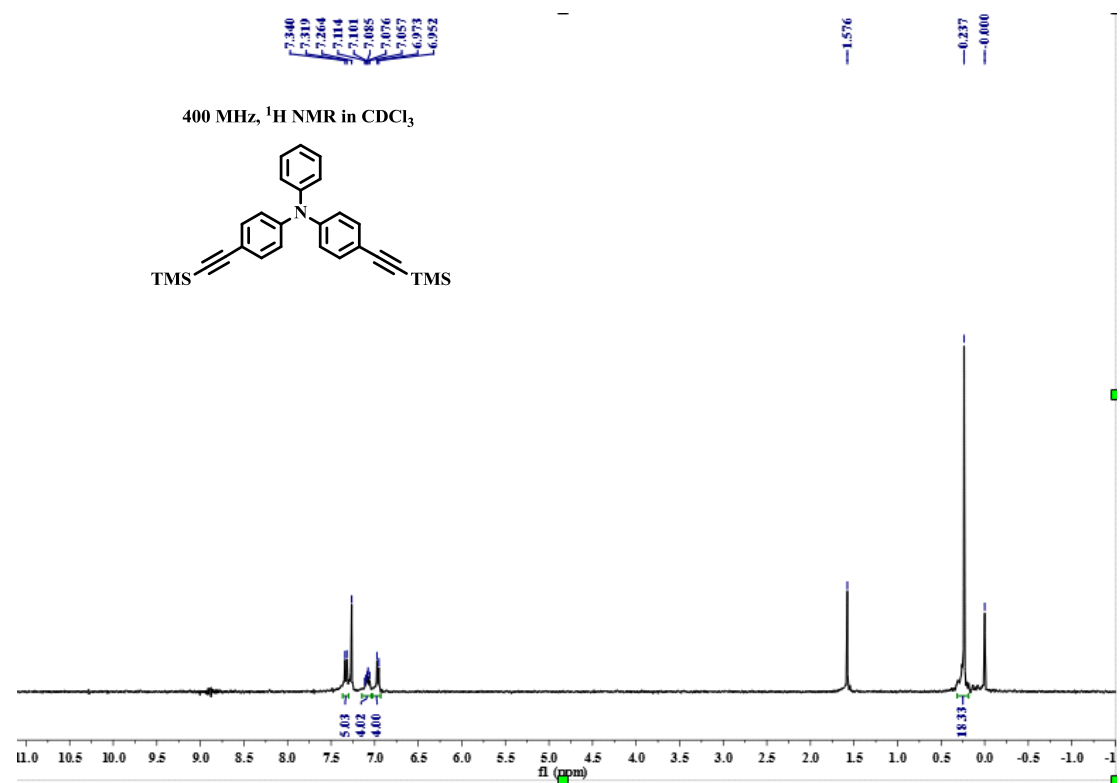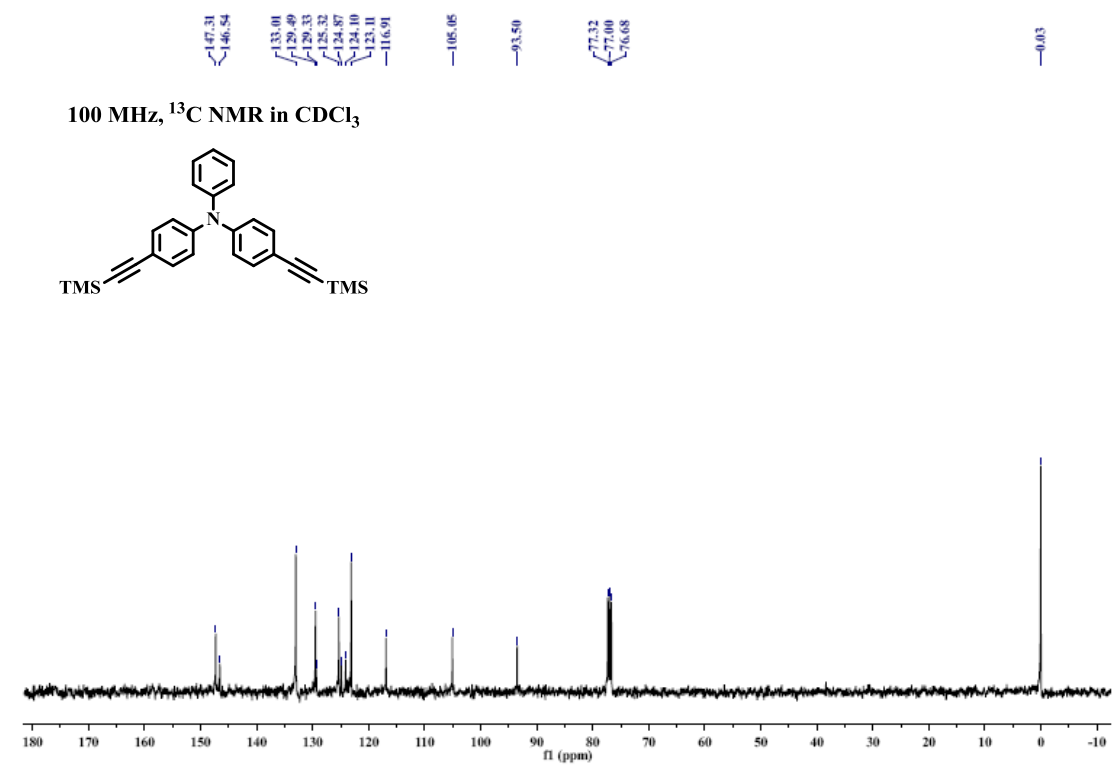

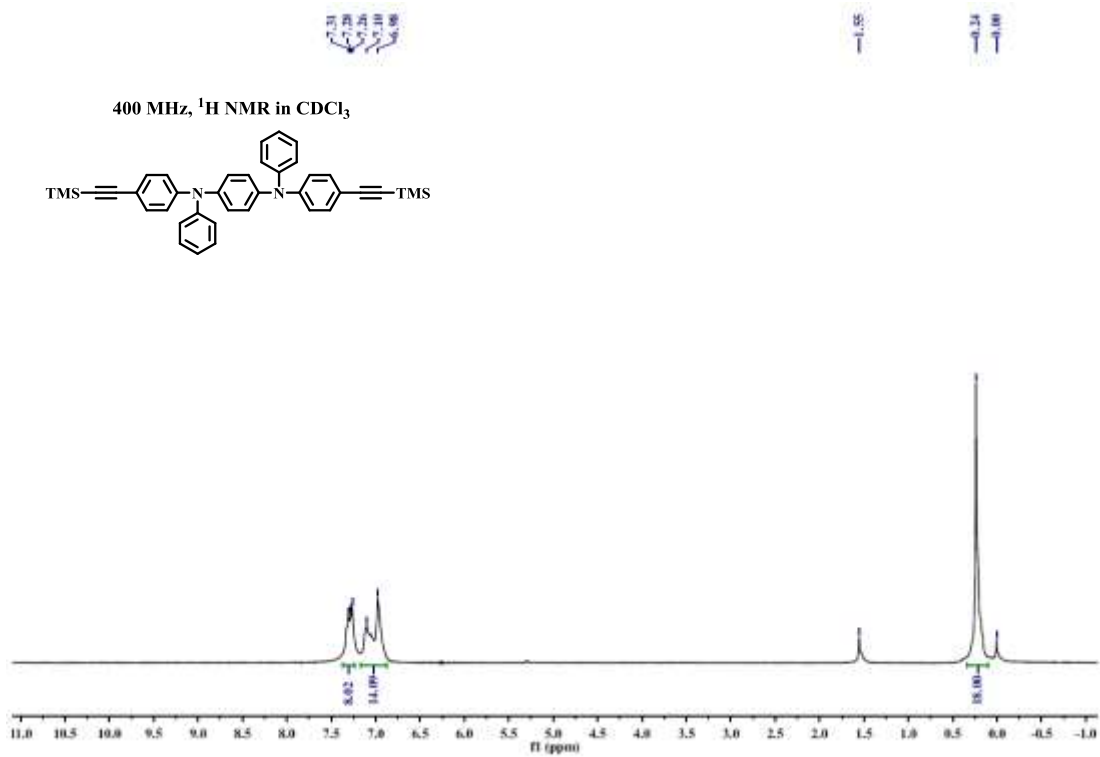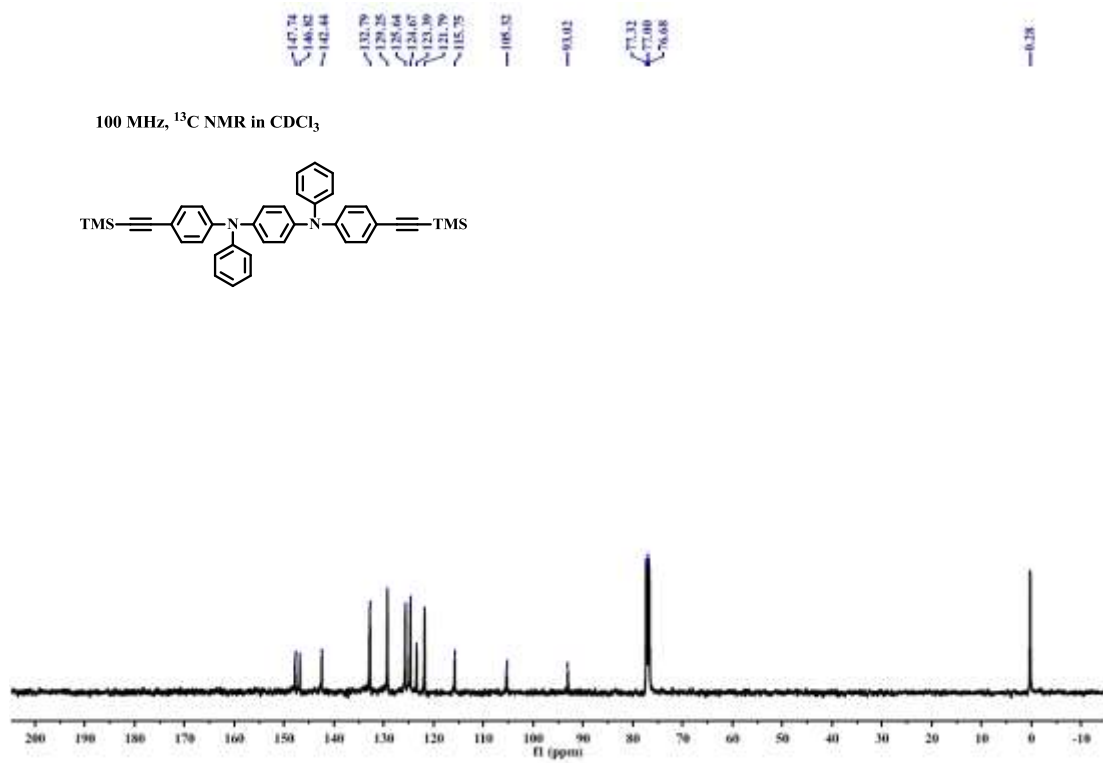

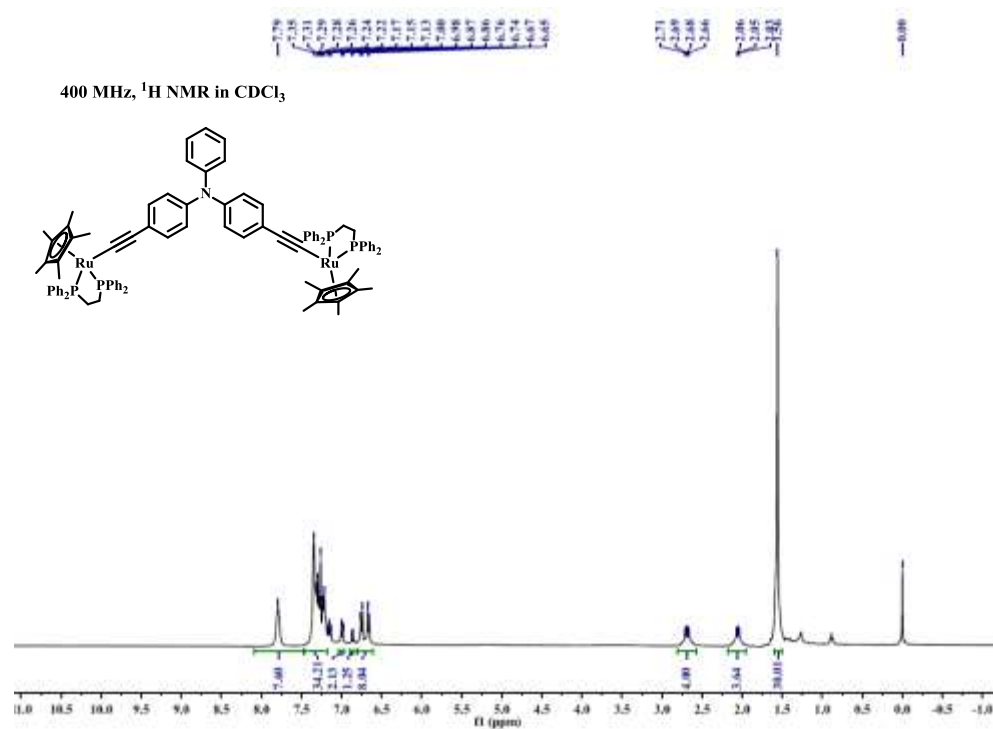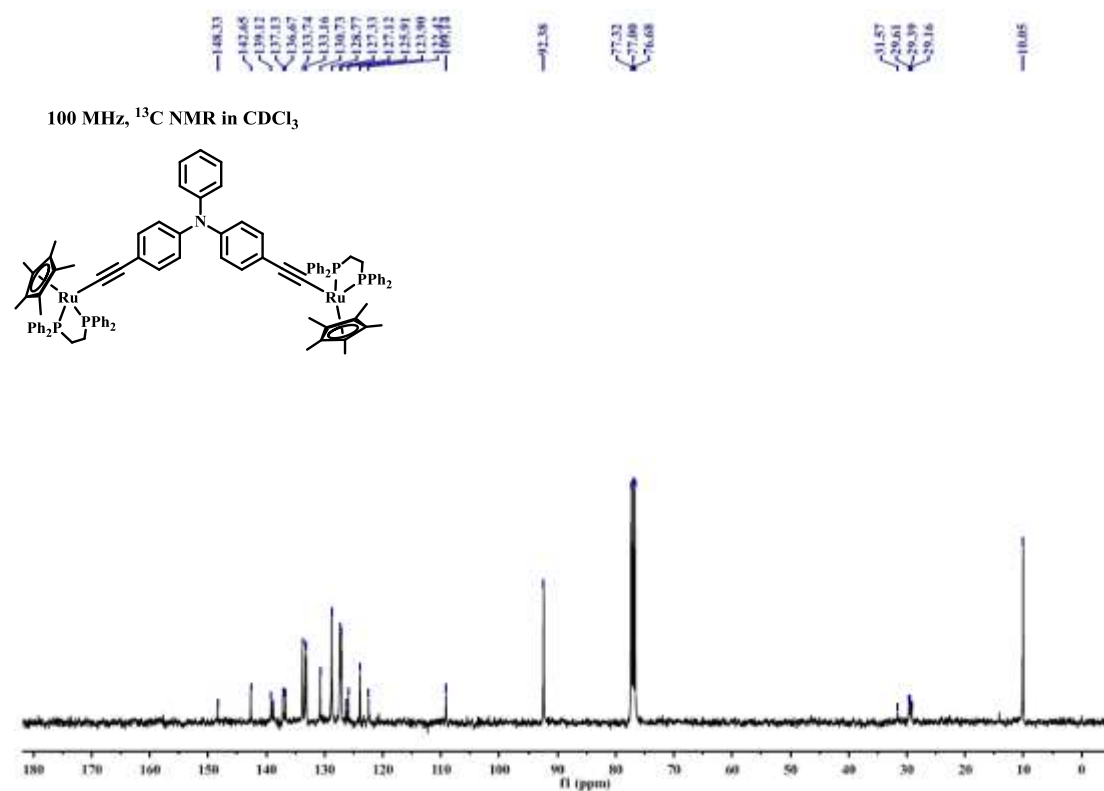

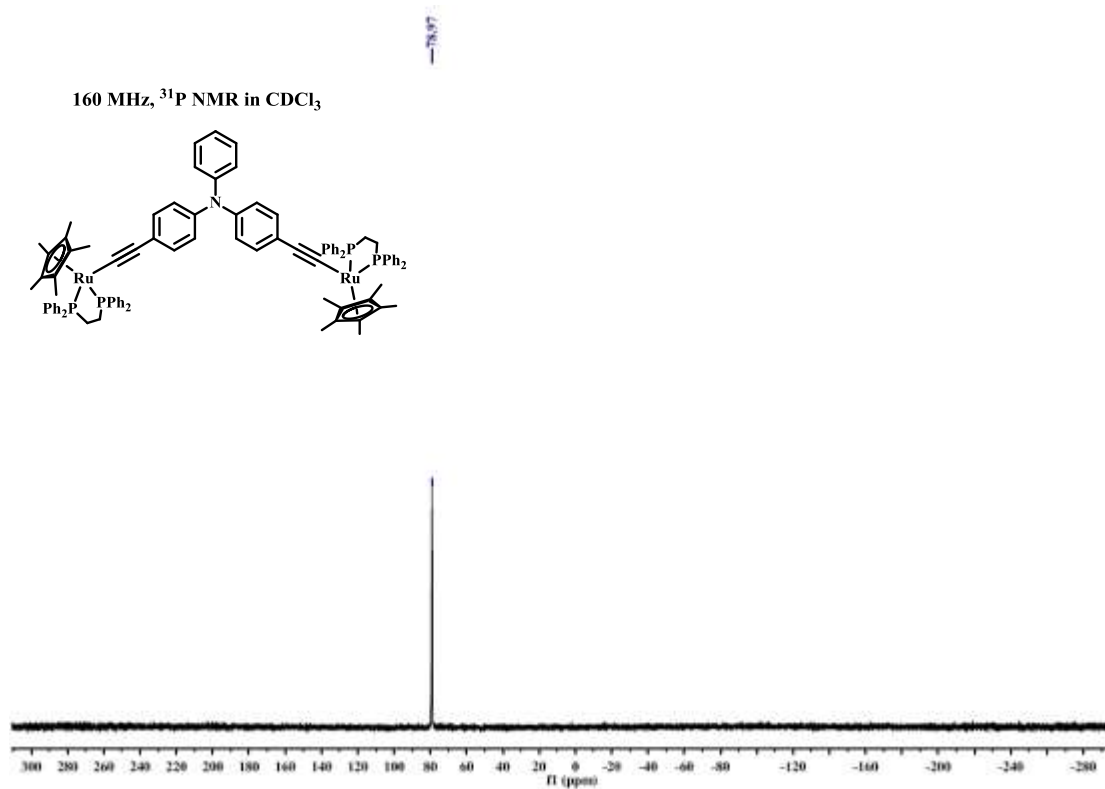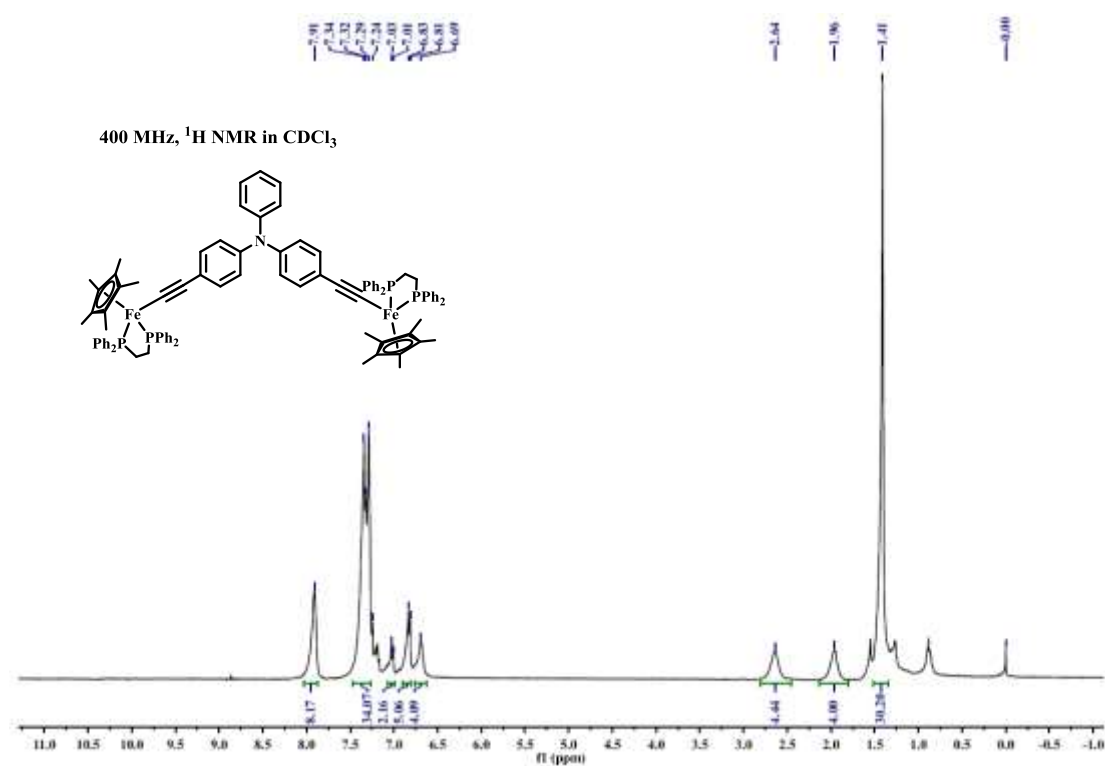

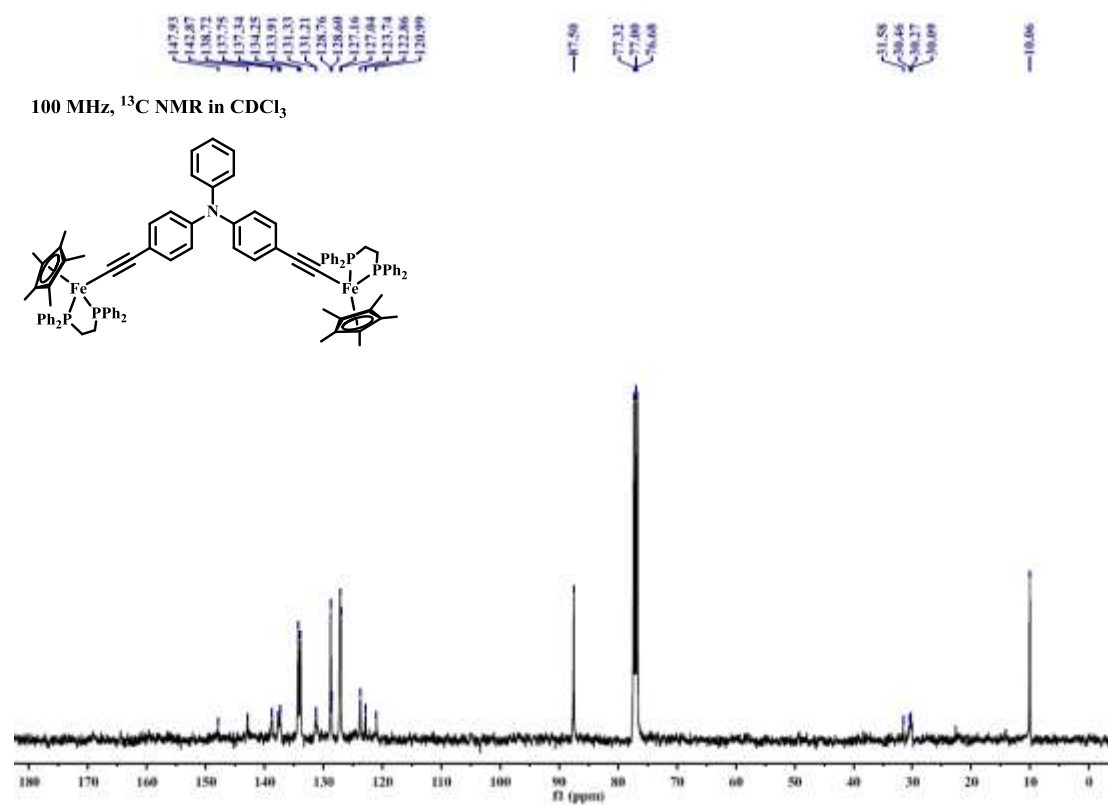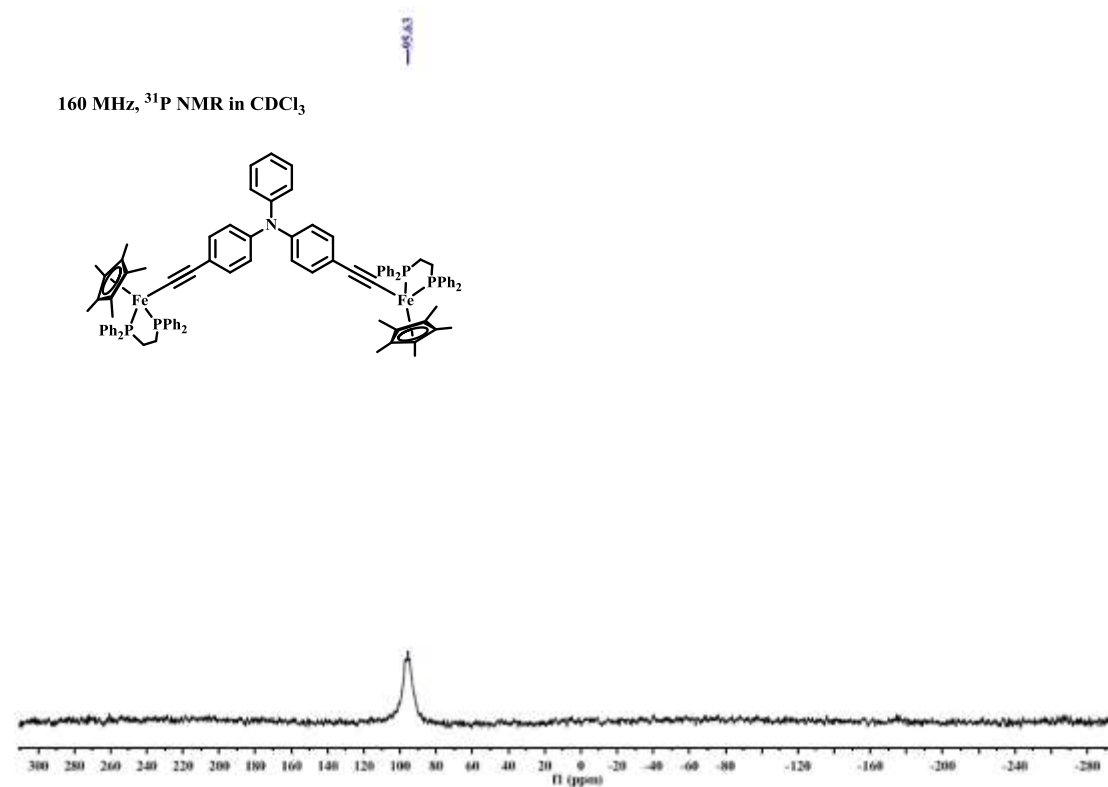



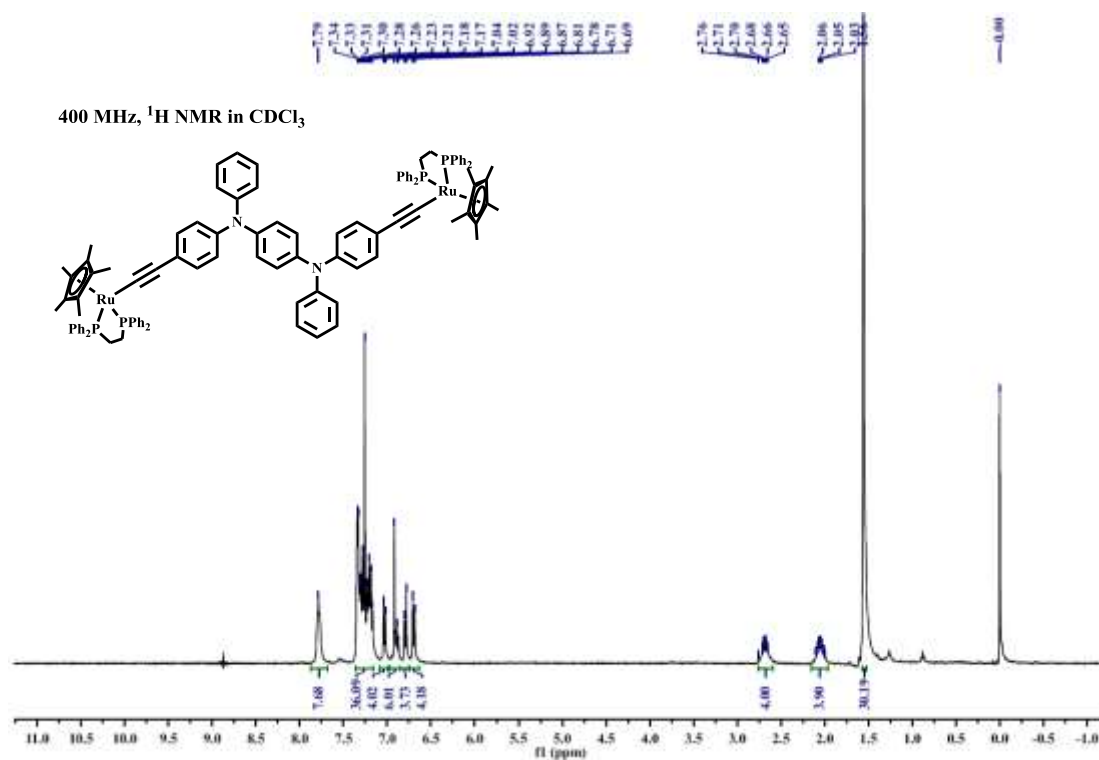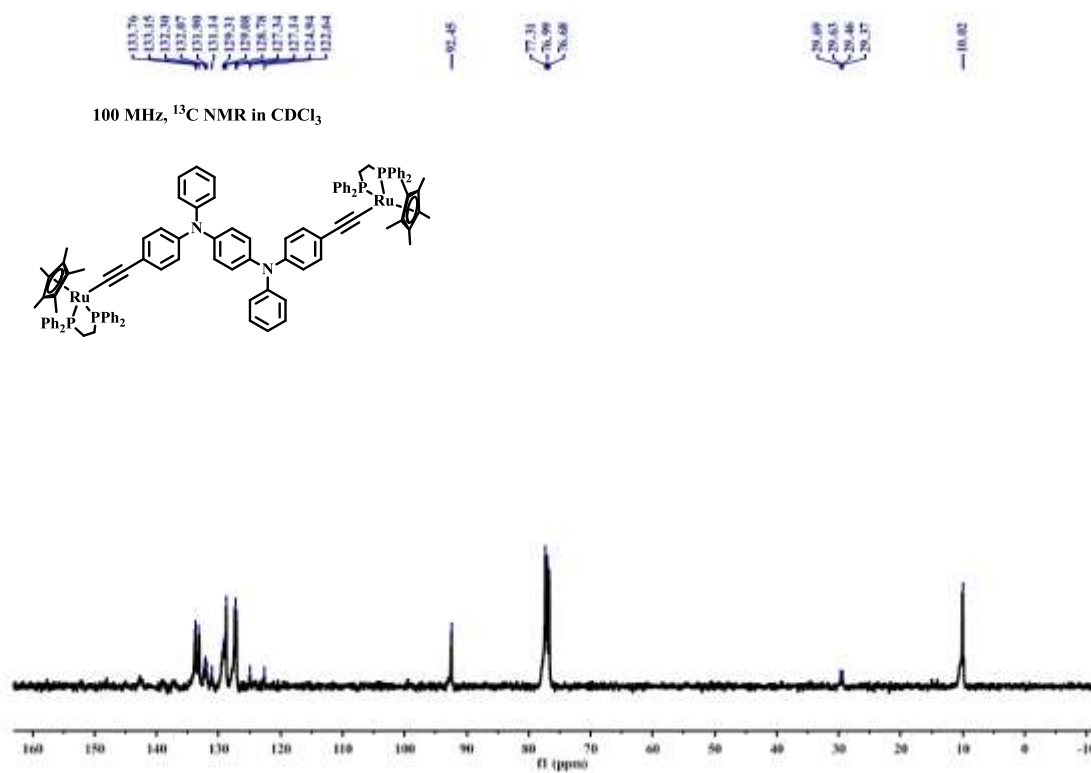

160 MHz,  $^{31}\text{P}$  NMR in  $\text{CDCl}_3$

-70.86

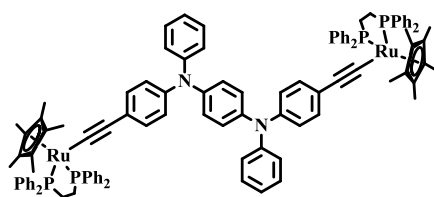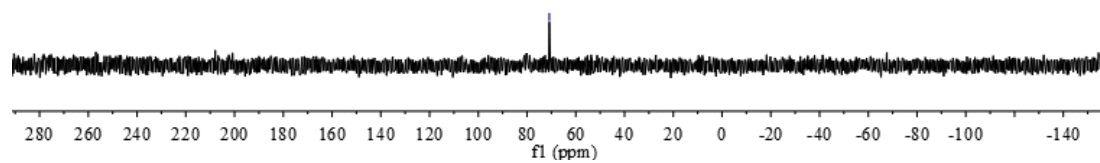

Supplement: Supplementary file 1 [file 7300601]
